# Supplementary material
Source: PubMed Central journal article supplement (PMC3163729)
Supplement: NIHMS299117-supplement-supplement_1.pdf [file NIHMS299117-supplement-supplement_1.pdf]

S1. Rotated Varimax Principal Axis Factor Solution for Toddler Behavior Assessment Questionnaire (TBAQ) scales

| <b>Scales</b>                    | <b>Factors</b>         |                          |                          |
|----------------------------------|------------------------|--------------------------|--------------------------|
|                                  | <i>Negative Affect</i> | <i>Effortful Control</i> | <i>Fear vs. Pleasure</i> |
| Anger                            | <b>.82</b>             | -.17                     | .05                      |
| Sadness                          | <b>.65</b>             | .06                      | .20                      |
| Activity Level                   | <b>.55</b>             | -.31                     | -.14                     |
| Soothability                     | <b>-.45</b>            | .06                      | -.22                     |
| Appropriate Attention Allocation | -.19                   | <b>.89</b>               | -.08                     |
| Interest                         | -.07                   | <b>.80</b>               | -.09                     |
| Inhibitory Control               | -.51                   | <b>.63</b>               | .03                      |
| Social Fear                      | .16                    | -.01                     | <b>.74</b>               |
| Pleasure                         | .13                    | .21                      | <b>-.50</b>              |
| Object Fear                      | .30                    | .07                      | <b>.50</b>               |

Note: N = 2052. Note that while some scales have high secondary factor loadings, this solution is conceptually similar to that found in other temperament studies (see Rothbart, *et al.*, Child Dev, 72: 1394-1408, 2001).
